## **Multiple antibodies identify Glypican-1 on serum exosomes from patients with pancreatic cancer**

Sonia Melo<sup>1,2,3</sup>, Christoph Kahlert<sup>4</sup>, Valerie LeBleu<sup>5</sup> & Raghu Kalluri<sup>5</sup>

<sup>1</sup> *Instituto de Investigação e Inovação em Saúde, Universidade do Porto, Portugal (iI3S), 4200 Porto, Portugal;* <sup>2</sup> *Institute of Pathology and Molecular Immunology of the University of Porto (IPATIMUP), 4200 Porto, Portugal;* <sup>3</sup> *Medical School, Porto University (FMUP), 4200 Porto, Portugal*

<sup>4</sup> *Department of Gastrointestinal, Thoracic and Vascular Surgery, Technische Universität Dresden, Germany*

<sup>5</sup> *Department of Cancer Biology, Metastasis Research Center, University of Texas MD Anderson Cancer Center, Houston, TX 77005*

We previously reported on the detection of the heparin sulfate proteoglycan Glypican-1 (GPC1) on serum-derived exosomes in patients with pancreatic cancer and breast cancer<sup>1</sup>.

GPC1 expression is elevated in several cancer types and associated with poor prognosis<sup>2,3</sup>, including in pancreas cancer cells, mouse and human pancreatic cancer<sup>4-9</sup>.

Informed by genetic studies, GPC1 is proposed to control fibroblast growth factor (FGF) signaling in mouse brain development<sup>10</sup>, and may be critical for pancreatic cancer cell proliferation and VEGF-A induced pancreatic tumor angiogenic response<sup>5,6</sup>. The proteoglycan GPC1, GPI-anchored to the cell surface, acts as a co-receptor for several heparin binding growth factors, thereby implicating it in promoting tumor progression<sup>6-9,11</sup>.

In patients with pancreatic cancer, we described the enrichment of GPC1<sup>+</sup> exosomes in the circulation when compared to healthy controls<sup>1</sup>. Exosomes are nano-sized extracellular vesicles produced by all cells and abundantly found in the circulation<sup>12</sup>. The renewed interest in their biology was fueled by their potential as liquid

biopsies for various pathologies, including cancer. Although there are likely distinct subpopulations of exosomes with various biological properties, exosomes are generally carriers of the nucleic acids and proteins that reflect their cell of origin<sup>12</sup>. As such, exosomes from the serum of patients emerged as an attractive approach to possibly detect cancerous lesions and monitor and predict outcome of cancer patients. Several studies have recently reported findings related to GPC1 detection on exosomes, including in breast cancer cells-derived exosomes, as well as colorectal and pancreas cancer cases<sup>13-16</sup> (**Table 1**). Although the methodologies differed in each study, GPC1 was indeed elevated in exosomes of patients with cancer.

Here we report on the use of two anti-glypican 1 antibodies for the specific detection of GPC1<sup>+</sup> exosomes in the circulation of pancreas cancer patients (n=10) compared to healthy donors (n=9) and benign pancreatic diseases (BPD, n=2) using flow cytometry as a readout. The ThermoFisher antibody used in our initial report<sup>1</sup> (PA5-28055) is commercially available. We also utilized antibody SAB2700282 from Sigma. Both companies described the immunogen as a recombinant fragment of human GPC1 corresponding to a region within amino acids 200 and 558. We report on the highly reproducible and strong correlation between samples evaluated with each of these antibodies (**Figure 1A-B**). Notably, all 10 patients with PDAC showed elevated circulating GPC1<sup>+</sup> exosomes bound-beads, in contrast with the 9 healthy donors and 2 BPD samples (**Figure 1A, Table 2**). We also proceeded with analyses using the ThermoFisher anti-GPC1 antibody PA5-24972, however we noted this antibody did not reproduce our initial findings (**Table 3**). Further, when exosomes were collected using isolation kits rather than the described ultracentrifugation procedure, the accuracy of

detection was lost. Therefore, ultracentrifugation for exosomes enrichment is required to evaluate GPC1 on exosomes.

In an effort to engage the scientific community in evaluating the utility of GPC1<sup>+</sup> exosomes in early detection or monitoring of pancreas cancer patients, we provide a detailed methodology, in a step-wise manner, to accompany the findings reported therein (**Table 4**).

We look forward to a productive scientific discourse on our ongoing efforts to identify GPC1 on cancer exosomes using different methods and antibodies.

## **Methods**

We provide a detailed protocol in **Table 4** that describes the procedure for exosomes purification and flow cytometry analyses of GPC1 on exosomes. The secondary antibody used was Alexa Fluor 488 goat anti-rabbit (Invitrogen A11008). The aldehyde/sulfate beads were obtained from Invitrogen (A37304).

Serum samples were obtained from patients with pancreatic cancer. Serum samples were also obtained from patients with a benign pancreas disease and from healthy donors, who had no evidence of acute or chronic or malignant disease and had no surgery within the past 12 months. The cases were obtained under an IRB-exempt protocol of the MD Anderson Cancer Center (IRB no. PA14-0154).

## Figure legends

**Figure 1.** A Flow cytometry analyses for the % of GPC1<sup>+</sup> circulating exosomes on beads, comparing the two anti-GPC1 antibodies listed. **B.** Linear regression analysis between % of GPC1<sup>+</sup> circulating exosomes on beads obtained using each of the listed antibodies.

## References:

- 1 Melo, S. A. *et al.* Glypican-1 identifies cancer exosomes and detects early pancreatic cancer. *Nature* **523**, 177-182, doi:10.1038/nature14581 (2015).
- 2 Hara, H. *et al.* Overexpression of glypican-1 implicates poor prognosis and their chemoresistance in oesophageal squamous cell carcinoma. *Br J Cancer* **115**, 66-75, doi:10.1038/bjc.2016.183 (2016).
- 3 Matsuda, K. *et al.* Glypican-1 is overexpressed in human breast cancer and modulates the mitogenic effects of multiple heparin-binding growth factors in breast cancer cells. *Cancer Res* **61**, 5562-5569 (2001).
- 4 Lu, H. *et al.* Elevated glypican-1 expression is associated with an unfavorable prognosis in pancreatic ductal adenocarcinoma. *Cancer Med*, doi:10.1002/cam4.1064 (2017).
- 5 Whipple, C. A., Young, A. L. & Korc, M. A KrasG12D-driven genetic mouse model of pancreatic cancer requires glypican-1 for efficient proliferation and angiogenesis. *Oncogene* **31**, 2535-2544, doi:10.1038/onc.2011.430 (2012).
- 6 Aikawa, T. *et al.* Glypican-1 modulates the angiogenic and metastatic potential of human and mouse cancer cells. *J Clin Invest* **118**, 89-99, doi:10.1172/JCI32412 (2008).
- 7 Kayed, H. *et al.* Correlation of glypican-1 expression with TGF-beta, BMP, and activin receptors in pancreatic ductal adenocarcinoma. *Int J Oncol* **29**, 1139-1148 (2006).
- 8 Kleeff, J. *et al.* Stable transfection of a glypican-1 antisense construct decreases tumorigenicity in PANC-1 pancreatic carcinoma cells. *Pancreas* **19**, 281-288 (1999).
- 9 Kleeff, J. *et al.* The cell-surface heparan sulfate proteoglycan glypican-1 regulates growth factor action in pancreatic carcinoma cells and is overexpressed in human pancreatic cancer. *J Clin Invest* **102**, 1662-1673, doi:10.1172/JCI4105 (1998).
- 10 Jen, Y. H., Musacchio, M. & Lander, A. D. Glypican-1 controls brain size through regulation of fibroblast growth factor signaling in early neurogenesis. *Neural Dev* **4**, 33, doi:10.1186/1749-8104-4-33 (2009).
- 11 Ding, K., Lopez-Burks, M., Sanchez-Duran, J. A., Korc, M. & Lander, A. D. Growth factor-induced shedding of syndecan-1 confers glypican-1 dependence on

- mitogenic responses of cancer cells. *J Cell Biol* **171**, 729-738, doi:10.1083/jcb.200508010 (2005).
- 12 Kalluri, R. The biology and function of exosomes in cancer. *J Clin Invest* **126**, 1208-1215, doi:10.1172/JCI81135 (2016).
- 13 Lai, X. *et al.* A microRNA signature in circulating exosomes is superior to exosomal glypican-1 levels for diagnosing pancreatic cancer. *Cancer Lett* **393**, 86-93, doi:10.1016/j.canlet.2017.02.019 (2017).
- 14 Li, J. *et al.* GPC1 exosome and its regulatory miRNAs are specific markers for the detection and target therapy of colorectal cancer. *J Cell Mol Med* **21**, 838-847, doi:10.1111/jcmm.12941 (2017).
- 15 Etayash, H., McGee, A. R., Kaur, K. & Thundat, T. Nanomechanical sandwich assay for multiple cancer biomarkers in breast cancer cell-derived exosomes. *Nanoscale* **8**, 15137-15141, doi:10.1039/c6nr03478k (2016).
- 16 Yang, K. S. *et al.* Multiparametric plasma EV profiling facilitates diagnosis of pancreatic malignancy. *Sci Transl Med* **9**, doi:10.1126/scitranslmed.aal3226 (2017).

## A

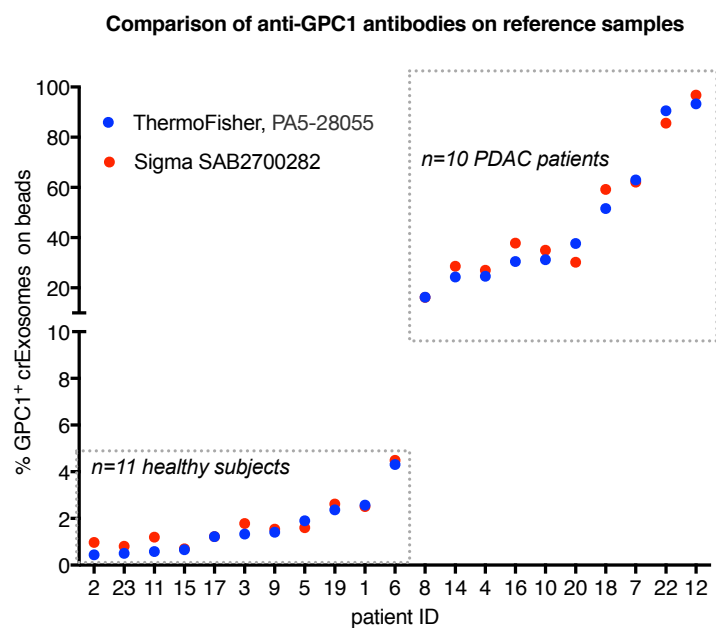

## B

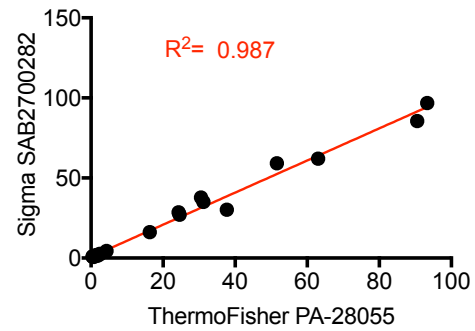

**Table 1**

| <b>Study</b>             | <b>Link</b>                                                                                                     | <b>Exosomes source</b>                                                                                                                                                                       | <b>Exosomes extraction procedure</b>                                           | <b>Readout</b>                                                                                                         | <b>Notes and conclusions</b>                                                                                                                                                         |
|--------------------------|-----------------------------------------------------------------------------------------------------------------|----------------------------------------------------------------------------------------------------------------------------------------------------------------------------------------------|--------------------------------------------------------------------------------|------------------------------------------------------------------------------------------------------------------------|--------------------------------------------------------------------------------------------------------------------------------------------------------------------------------------|
| Etayash H. et al. (2016) | <a href="https://www.ncbi.nlm.nih.gov/pubmed/27492928">https://www.ncbi.nlm.nih.gov/pubmed/27492928</a>         | Cell culture supernatant                                                                                                                                                                     | 0.2um filter and ultracentrifugation                                           | Nanomechanical sandwich assay, EMD Millipore, Clone 4D1 anti-GPC1                                                      | GPC1 detection with excellent sensitivity                                                                                                                                            |
| Jian Li L. et al. (2016) | <a href="https://www.ncbi.nlm.nih.gov/pubmed/28233416">https://www.ncbi.nlm.nih.gov/pubmed/28233416</a>         | Serum from 102 patients with colorectal cancer                                                                                                                                               | ExoCap™ Exosomes Isolation and Enrichment kit (JSR Micro Materials Innovation) | FC with aldehyde/sulphate latex beads, SantaCruz anti-GPC1 antibody                                                    | GPC1+ circulating exosomes are sepcific markers fo the diagnosis of colorectal cancer                                                                                                |
| Lai X. et al. (2017)     | <a href="https://www.ncbi.nlm.nih.gov/pubmed/28232049">https://www.ncbi.nlm.nih.gov/pubmed/28232049</a>         | Plasma from 6 normal control subjects, 3 patients with chronic pancreatitis, and 3 patients with PDAC                                                                                        | 0.2um filter and ultracentrifugation                                           | LC-MS/MS                                                                                                               | Despite the low sample number and lack of normalization of exosomes concentration prior to analyses, PDAC patients show elevated GPC1+ exosomes.                                     |
| Yang K.S. et al. (2017)  | <a href="http://stm.sciencemag.org/content/9/391/eaal3226">http://stm.sciencemag.org/content/9/391/eaal3226</a> | Plasma from 2 cohorts of patients: Cohort 1 (Trainign cohort, n=22 PDAC, n=10 normal); Cohort 2 (Prospective cohort, n=46 PDAC, n=13 IPMN, n=12 NET, n=11 other cancer, n=21 begnin+control) | 0.2um filter and ultracentrifugation                                           | Nanoplasmonic sensors, R&D Systems BAF4519 biotinylated anti-GPC1 antibody, ThermoFisher PA5-24972 anti GPC1 antibody, | GPC1 alone showed 55% sensitivity and 60% specificity for cohort 1, 82% sensitivity and 52 specificity for cohort 2. PDAC GPC1+ exosomes signals were elevated compared to controls. |

Table 2

| ID | Secondary only (Alex 488) |        | Sigma SAB2700282 |        | Secondary only (Alex 488) |        | ThermoFisher PA5-28 |        | Size (nm) | Concentration (E+9 exos/ml) | # exos used in analysis | # events (FC) | Final volume | Voltage | Source | Diagnosis | Additional information  | Sex     | Age     |
|----|---------------------------|--------|------------------|--------|---------------------------|--------|---------------------|--------|-----------|-----------------------------|-------------------------|---------------|--------------|---------|--------|-----------|-------------------------|---------|---------|
|    | %beads                    | %FITC+ | %beads           | %FITC+ | %beads                    | %FITC+ | %beads              | %FITC+ |           |                             |                         |               |              |         |        |           |                         |         |         |
| 1  | 98.5                      | 0.82   | 98.9             | 2.51   | 98.5                      | 0.82   | 98.5                | 2.57   | 120.6     | 1.08                        | 3.8x10 <sup>10</sup>    | 10000         | 300 u        | 440     | MDACC  | Healthy   |                         | Unknown | Unknown |
| 5  | 60.4                      | 0.37   | 72.2             | 1.6    | 97.5                      | 0.61   | 91.9                | 1.9    | 123.7     | 0.577                       | 3.8x10 <sup>10</sup>    | 10000         | 300 u        | 390     | MDACC  | Healthy   |                         | Unknown | Unknown |
| 9  | 60.3                      | 0.79   | 74.4             | 1.54   | 93.6                      | 1.24   | 93.6                | 1.41   | 50.3      | 0.928                       | 3.8x10 <sup>10</sup>    | 10000         | 300 u        | 280     | MDACC  | Healthy   |                         | Unknown | Unknown |
| 11 | 98                        | 0.92   | 98.7             | 1.2    | 80.9                      | 0.88   | 80.7                | 0.58   | 59.7      | 0.682                       | 3.8x10 <sup>10</sup>    | 10000         | 300 u        | 270     | MDACC  | Healthy   |                         | Unknown | Unknown |
| 15 | 98.4                      | 0.32   | 98.6             | 0.7    | 95.2                      | 0.93   | 98.6                | 0.66   | 99.4      | 3.39                        | 3.8x10 <sup>10</sup>    | 10000         | 300 u        | 350     | MDACC  | Healthy   |                         | Unknown | Unknown |
| 17 | 96.1                      | 1.37   | 95.9             | 1.22   | 81.5                      | 1.36   | 82.6                | 1.22   | 102.6     | 2.38                        | 3.8x10 <sup>10</sup>    | 10000         | 300 u        | 245     | MDACC  | Healthy   |                         | Unknown | Unknown |
| 19 | 92                        | 1.04   | 94.6             | 2.62   | 76.3                      | 0.59   | 82.2                | 2.37   | 122.2     | 0.496                       | 3.8x10 <sup>10</sup>    | 10000         | 300 u        | 340     | MDACC  | Healthy   |                         | Unknown | Unknown |
| 23 | 98.6                      | 0.19   | 98.6             | 0.81   | 95.3                      | 1.23   | 98.3                | 0.5    | 86.4      | 3.9                         | 3.8x10 <sup>10</sup>    | 10000         | 300 u        | 311     | MDACC  | Healthy   |                         | Unknown | Unknown |
| 2  | 97.7                      | 1.05   | 97.7             | 0.97   | 95.8                      | 1.08   | 98.6                | 0.44   | 98.5      | 4.04                        | 3.8x10 <sup>10</sup>    | 10000         | 300 u        | 265     | MDACC  | Healthy   | Serous cystadenoma      | MALE    | 77      |
| 6  | 98.8                      | 0.93   | 98.8             | 4.49   | 46.6                      | 0.75   | 52.5                | 4.31   | 55.2      | 1.72                        | 3.8x10 <sup>10</sup>    | 10000         | 300 u        | 265     | MDACC  | Healthy   | Autoimmune pancreatitis | MALE    | 85      |
| 4  | 97.2                      | 1      | 98.4             | 27     | 71.2                      | 1.45   | 89.7                | 24.6   | 110       | 3.25                        | 3.8x10 <sup>10</sup>    | 10000         | 300 u        | 380     | MDACC  | PDAC      | AJCC IV                 | FEMALE  | 74      |
| 8  | 97.4                      | 0.77   | 98.6             | 16.2   | 42.9                      | 0.12   | 52.5                | 16.3   | 79.4      | 4.09                        | 3.8x10 <sup>10</sup>    | 10000         | 300 u        | 300     | MDACC  | PDAC      | AJCC IIB                | FEMALE  | 64      |
| 10 | 60.7                      | 0.66   | 61.6             | 35     | 93.7                      | 1.34   | 80.3                | 31.2   | 50.7      | 2.57                        | 3.8x10 <sup>10</sup>    | 10000         | 300 u        | 255     | MDACC  | PDAC      | AJCC IIB                | MALE    | 61      |
| 12 | 81.9                      | 0.99   | 76.2             | 96.8   | 61.1                      | 1.65   | 58.6                | 93.3   | 99.3      | 4.63                        | 3.8x10 <sup>10</sup>    | 10000         | 300 u        | 395     | MDACC  | PDAC      | AJCC IIB                | MALE    | 66      |
| 14 | 97.2                      | 0.14   | 98.8             | 28.6   | 98.6                      | 0.42   | 98.3                | 24.3   | 61.1      | 5.39                        | 3.8x10 <sup>10</sup>    | 10000         | 300 u        | 280     | MDACC  | PDAC      | AJCC IIB                | MALE    | 65      |
| 16 | 97.2                      | 0.96   | 71.6             | 37.8   | 71.2                      | 1.03   | 77.1                | 30.5   | 122       | 3.21                        | 3.8x10 <sup>10</sup>    | 10000         | 300 u        | 400     | MDACC  | PDAC      | AJCC IIA                | MALE    | 69      |
| 18 | 60.9                      | 0.35   | 72.3             | 59.2   | 72.2                      | 1.97   | 68.3                | 51.6   | 102.9     | 0.772                       | 3.8x10 <sup>10</sup>    | 10000         | 300 u        | 390     | MDACC  | PDAC      | AJCC IIB                | FEMALE  | 58      |
| 20 | 95                        | 0.76   | 96.7             | 30.2   | 96.2                      | 0.42   | 92.6                | 37.7   | 49.4      | 0.74                        | 3.8x10 <sup>10</sup>    | 10000         | 300 u        | 268     | MDACC  | PDAC      | AJCC IIB                | MALE    | 50      |
| 22 | 83.1                      | 1.07   | 74.7             | 85.6   | 86.5                      | 0.6    | 77.3                | 90.5   | 84.6      | 7.36                        | 3.8x10 <sup>10</sup>    | 10000         | 300 u        | 370     | MDACC  | PDAC      | AJCC IIB                | FEMALE  | 79      |
| 7  | 82.8                      | 0.78   | 86.6             | 62.1   | 87.5                      | 0.72   | 86.5                | 63     | 81.2      | 1.54                        | 3.8x10 <sup>10</sup>    | 10000         | 300 u        | 375     | MDACC  | PDAC      | AJCC IIB                | FEMALE  | 80      |
| 3  | 85.9                      | 0.82   | 90.6             | 1.78   | 91.8                      | 0.96   | 94.9                | 1.33   | 71.3      | 4.76                        | 3.8x10 <sup>10</sup>    | 10000         | 300 u        | 260     | MDACC  | Healthy   |                         | Unknown | Unknown |



**Table 3**

|                      |        |                       |        |        |           |                             |                                     |               |              |         |         |                    |                        | From Melo et al Nature 2015 |     |                                      |           |                             |
|----------------------|--------|-----------------------|--------|--------|-----------|-----------------------------|-------------------------------------|---------------|--------------|---------|---------|--------------------|------------------------|-----------------------------|-----|--------------------------------------|-----------|-----------------------------|
| Secondary only (Ale) |        | ThermoFisher PA5-2479 |        |        |           |                             |                                     |               |              |         |         |                    |                        |                             |     | ThermoFisher PA5-28055               |           |                             |
| ID                   | %beads | %FITC+                | %beads | %FITC+ | Size (nm) | Concentration (E+9 exos/ml) | # exos used in analysis (E+10 exos) | # events (FC) | Final volume | Voltage | Source  | Diagnosis          | Additional information | Sex                         | Age | %FITC+ (depicting % GPC crExo beads) | Size (nm) | Concentration (E+9 exos/ml) |
| 1                    | 64.8   | 0.54                  | 69.5   | 16.2   | 83.9      | 6.39                        | 4                                   | 10000         | 300 u        | 255     | Germany | Serous cystadenoma | Not applicable         | Female                      | 72  | 2.6                                  | 105       | 2.01                        |
| 2                    | 61.8   | 0.45                  | 69.9   | 3.73   | 171.4     | 4.07                        | 4                                   | 10000         | 300 u        | 255     | Germany | BPD                | Not applicable         | Male                        | 58  | 1.1                                  | 154       | 1.87                        |
| 3                    | 69.3   | 0.57                  | 70.8   | 5      | 88        | 1.27                        | 4                                   | 10000         | 300 u        | 260     | Germany | PDAC               | AJCC IIA               | Female                      | 77  | 17.4                                 | 40        | 3.71                        |
| 4                    | 67.4   | 0.75                  | 71     | 3.97   | 70.6      | 3.42                        | 4                                   | 10000         | 300 u        | 265     | Germany | Healthy            | Anonymous              |                             |     | 1                                    | 132       | 2.94                        |

**Table 4**

|                                                                                                                                                                                                                                                                                                                                                                                                                                                                                                                                                                                                                                                                                                                                                                                                                                                                                                                                                 |
|-------------------------------------------------------------------------------------------------------------------------------------------------------------------------------------------------------------------------------------------------------------------------------------------------------------------------------------------------------------------------------------------------------------------------------------------------------------------------------------------------------------------------------------------------------------------------------------------------------------------------------------------------------------------------------------------------------------------------------------------------------------------------------------------------------------------------------------------------------------------------------------------------------------------------------------------------|
| <b>Protocol: GPC1 FC analyses on exosomes</b>                                                                                                                                                                                                                                                                                                                                                                                                                                                                                                                                                                                                                                                                                                                                                                                                                                                                                                   |
| <b>a. Exosomes purification</b>                                                                                                                                                                                                                                                                                                                                                                                                                                                                                                                                                                                                                                                                                                                                                                                                                                                                                                                 |
| 1. Thaw the serum/plasma in 37°C water by shaking it.                                                                                                                                                                                                                                                                                                                                                                                                                                                                                                                                                                                                                                                                                                                                                                                                                                                                                           |
| 2. Centrifuge at 800G for 5 min, RT.                                                                                                                                                                                                                                                                                                                                                                                                                                                                                                                                                                                                                                                                                                                                                                                                                                                                                                            |
| 3. Centrifuge at 2000G for 10 min, RT                                                                                                                                                                                                                                                                                                                                                                                                                                                                                                                                                                                                                                                                                                                                                                                                                                                                                                           |
| 4. Collect supernatant and discard pellet (cells and debris).                                                                                                                                                                                                                                                                                                                                                                                                                                                                                                                                                                                                                                                                                                                                                                                                                                                                                   |
| 5. Filter supernatant through a 0.2 um membrane by syringe directly into UC tube. Use ~3mL PBS to wash through the filter.                                                                                                                                                                                                                                                                                                                                                                                                                                                                                                                                                                                                                                                                                                                                                                                                                      |
| 6. Add PBS to the ultracentrifuge tube for a final volume of 11mL. Centrifuge the samples at 100,000G overnight.                                                                                                                                                                                                                                                                                                                                                                                                                                                                                                                                                                                                                                                                                                                                                                                                                                |
| <b>b. FC GPC1</b>                                                                                                                                                                                                                                                                                                                                                                                                                                                                                                                                                                                                                                                                                                                                                                                                                                                                                                                               |
| 6. A total of 6 samples maximum should be included per round of analyses.                                                                                                                                                                                                                                                                                                                                                                                                                                                                                                                                                                                                                                                                                                                                                                                                                                                                       |
| 7. Frozen exosomes: allow exosomes to rotate at RT for 1hr at RT.                                                                                                                                                                                                                                                                                                                                                                                                                                                                                                                                                                                                                                                                                                                                                                                                                                                                               |
| 8. Nanosight measurements: performed just prior to setting up exosomes for FC. A good exosomes prep concentration should range in the $\sim 10^{10}$ exo/ml concentration (for a 1:100 dilution (cells)). Nanosight measurements for serum are usually using 1:1000 dilution of the sample.<br><i>Note: Ideally, <math>5 \times 10^{10}</math> exosomes for 5ul beads. For a sample with a nanosight read of <math>10^{10}</math> exo/ml (not accounting for dilution), the final concentration is <math>10^{12}</math> exo/ml or of <math>10^{09}</math> exo/ul and the total (usually exosomes are resuspended in 200ul PBS) is <math>2 \times 10^{11}</math>. For <math>5 \times 10^{10}</math> exosomes: 50ul. If volume is greater than 50ul, allow exo+beads to incubate for 2hrs at RT (see below).</i><br><i>Note 2: if for any reason the read is poor, nanosight measurements must be repeated prior to repeating the experiment.</i> |
| 9. Mix beads very well. Take 5ul of beads and mix with 100ul PBS. Allow beads to rotate for 15' at RT.                                                                                                                                                                                                                                                                                                                                                                                                                                                                                                                                                                                                                                                                                                                                                                                                                                          |
| 10. Add exosomes ( $5 \times 10^{10}$ ; ~50ul. If volume of exosomes if greater than 50ul, allow exo+beads to incubate for 2hrs at RT) and mix well when adding to beads. Add PBS to volume up to 400ul. Allow to rotate at RT for at least 1 hour.                                                                                                                                                                                                                                                                                                                                                                                                                                                                                                                                                                                                                                                                                             |
| 11. Add 400ul 1M glycine in PBS. Allow to rotate at RT for 1 hour.                                                                                                                                                                                                                                                                                                                                                                                                                                                                                                                                                                                                                                                                                                                                                                                                                                                                              |
| 12. Spin down 12,000rpm 2min RT, discard supernatant (pipette out) and leave ~20ul volume in tube.                                                                                                                                                                                                                                                                                                                                                                                                                                                                                                                                                                                                                                                                                                                                                                                                                                              |
| 13. Resuspend beads in 100ul 10% BSA/PBS. Care not to create bubbles. Allow to rotate at RT for 45'                                                                                                                                                                                                                                                                                                                                                                                                                                                                                                                                                                                                                                                                                                                                                                                                                                             |
| 14. Spin down 12,000rpm 2min RT, discard as much of the supernatant as possible (pipette out)                                                                                                                                                                                                                                                                                                                                                                                                                                                                                                                                                                                                                                                                                                                                                                                                                                                   |
| 15. Resuspend beads in 40ul of 2% BSA/PBS (mix well but gently, avoid bubbles).                                                                                                                                                                                                                                                                                                                                                                                                                                                                                                                                                                                                                                                                                                                                                                                                                                                                 |
| 16. Split samples into two new fresh tubes, each containing 20ul (discard the few ul left in the original tube). Tube 1 (negative control): add nothing. Tube 2 (staining): add 1.5ul of anti-GPC1 Sigma antibody and mix very well (caution for bubbles). Allow tubes to rotate at 4C O/N                                                                                                                                                                                                                                                                                                                                                                                                                                                                                                                                                                                                                                                      |
| 17. Spin down 12,000rpm 2min RT, discard as much of the supernatant as possible (pipette out)                                                                                                                                                                                                                                                                                                                                                                                                                                                                                                                                                                                                                                                                                                                                                                                                                                                   |
| 18. Resuspend beads in 20ul of 2% BSA/PBS. Add 1ul of secondary ab and mix well. Allow to rotate, covered from light, at RT 30'                                                                                                                                                                                                                                                                                                                                                                                                                                                                                                                                                                                                                                                                                                                                                                                                                 |
| 19. Spin down 12,000rpm 2min RT, discard as much of the supernatant as possible (pipette out)                                                                                                                                                                                                                                                                                                                                                                                                                                                                                                                                                                                                                                                                                                                                                                                                                                                   |
| 20. Perform 3x 200ul wash of the beads using 2% BSA/PBS. Mix well, avoid bubbles.                                                                                                                                                                                                                                                                                                                                                                                                                                                                                                                                                                                                                                                                                                                                                                                                                                                               |
| 21. Spin down 12,000rpm 2min RT, discard as much of the supernatant as possible (pipette out)                                                                                                                                                                                                                                                                                                                                                                                                                                                                                                                                                                                                                                                                                                                                                                                                                                                   |
| 22. Resuspend in 300ul 2% BSA/PBS, mix well, avoid bubbles, and pipette through facs tube filter.<br><i>Note: the samples must be read the same day, asap post completion of the staining. If kept O/N, the beads clump and read will be poor.</i>                                                                                                                                                                                                                                                                                                                                                                                                                                                                                                                                                                                                                                                                                              |
| 23. At acquisition during FC, adjust the FITC voltage to ensure NC peak (autofluorescence detected in exosomes + beads + secondary ab only) is less than $10^3$ FITC log scale and tail is ~1% into the positive signal (gate set at 103).                                                                                                                                                                                                                                                                                                                                                                                                                                                                                                                                                                                                                                                                                                      |
| 24. Acquire FC reads of the experimental sample with primary antibody.                                                                                                                                                                                                                                                                                                                                                                                                                                                                                                                                                                                                                                                                                                                                                                                                                                                                          |
| 25. For every each sample repeat procedure 23 and 24 to adjust for different autofluorescence in each patient sample.                                                                                                                                                                                                                                                                                                                                                                                                                                                                                                                                                                                                                                                                                                                                                                                                                           |
| 26. If selected population of beads on the scatter plot corresponds to less than 60% this indicates a poor coating of the beads with exosomes or poor washing steps. Sample analysis needs to be repeatd.                                                                                                                                                                                                                                                                                                                                                                                                                                                                                                                                                                                                                                                                                                                                       |
